# Supplementary material for: Preserved skeletal muscle protein anabolic response to acute exercise and protein intake in well-treated rheumatoid arthritis patients
Source: PubMed Central journal article supplement (PMC4583143; doi:10.1186/s13075-015-0758-3), 2015-09-25

## Additional file 2. Normalisation control

GAPDH gene expression data normalized to RPLP0 and individual baseline values, log-transformed for statistical analyses and shown on a logarithmic scale as geometric mean  $\pm$  SEM. Black bars denote rheumatoid arthritis patients (RA, n=13) and grey bars healthy controls (CON, n=13).

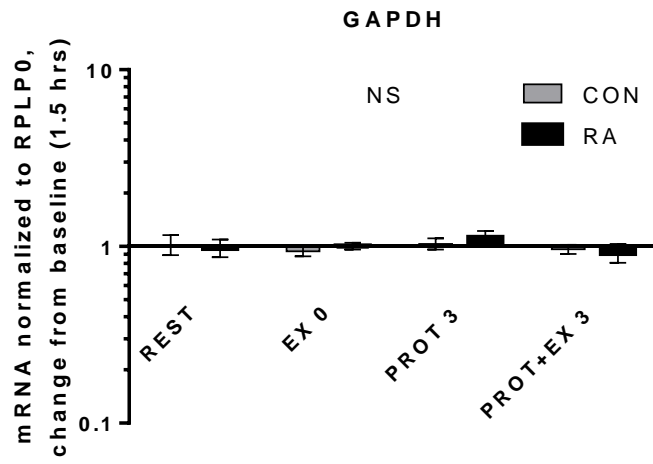

Supplement: 13075_2015_758_MOESM1_ESM.pdf [file 13075_2015_758_MOESM1_ESM.pdf]
