# Supplementary material for: Preserved skeletal muscle protein anabolic response to acute exercise and protein intake in well-treated rheumatoid arthritis patients
Source: PubMed Central journal article supplement (PMC4583143; doi:10.1186/s13075-015-0758-3), 2015-09-25

### Additional file 3. mRNA expression at baseline

Gene expression data were normalized to RPLP0, log-transformed for statistical analyses and shown on a logarithmic scale as geometric mean  $\pm$ SEM. Baseline expression of all targets is expressed relative to mean Healthy at baseline. Black bars denote rheumatoid arthritis patients (RA, n=13) and grey bars healthy controls (CON, n=13). No significant differences were observed between groups.

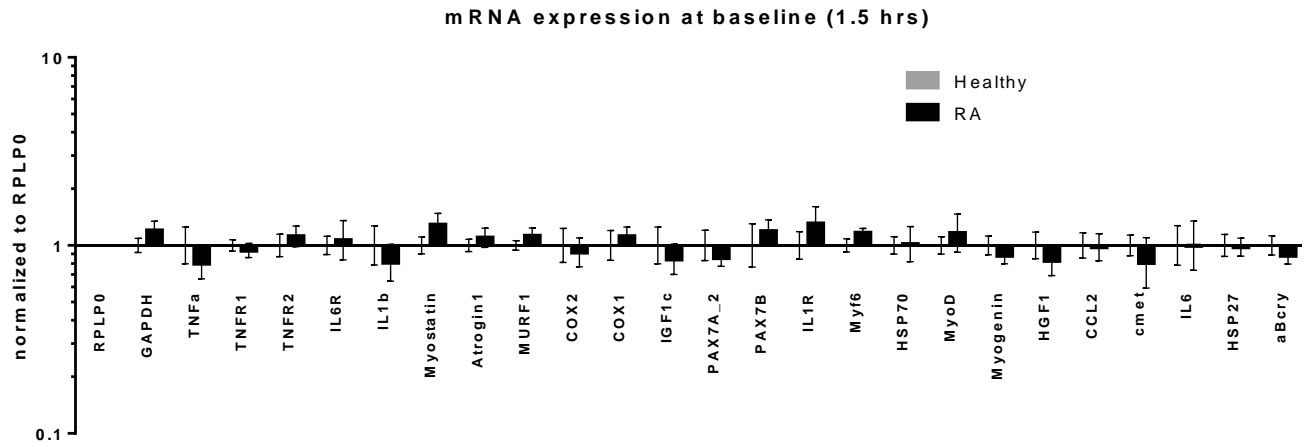

Supplement: 13075_2015_758_MOESM2_ESM.pdf [file 13075_2015_758_MOESM2_ESM.pdf]
