# Supplementary material for: Preserved skeletal muscle protein anabolic response to acute exercise and protein intake in well-treated rheumatoid arthritis patients
Source: PubMed Central journal article supplement (PMC4583143; doi:10.1186/s13075-015-0758-3), 2015-09-25
Supplement: 13075_2015_758_MOESM3_ESM.pdf [file 13075_2015_758_MOESM3_ESM.pdf]

## Additional file 1. Comorbidities

| <b>Table S1</b>          | <b>Comorbidities</b> |           |
|--------------------------|----------------------|-----------|
|                          | <b>CON</b>           | <b>RA</b> |
| Allergy                  | 0                    | 2         |
| Apopleksy                | 1                    | 0         |
| Asthma                   | 0                    | 4         |
| Cancer                   | 1                    | 0         |
| Cataract                 | 0                    | 1         |
| COPD                     | 0                    | 1         |
| Depression               | 0                    | 1         |
| Diverticulosis coli      | 0                    | 1         |
| Epilepsy                 | 0                    | 1         |
| Fibromyalgia             | 0                    | 1         |
| Gastric ulcer            | 0                    | 1         |
| Hemorrhoids              | 0                    | 1         |
| Herpes                   | 1                    | 0         |
| Hyper-cholesterolemia    | 1                    | 0         |
| Hypertension             | 2                    | 3         |
| Ichthyosis               | 0                    | 1         |
| Osteoporosis             | 0                    | 1         |
| Prostatic hyperplasia    | 0                    | 1         |
| Shingles                 | 0                    | 1         |
| Slipped disc             | 1                    | 1         |
| Struma                   | 0                    | 1         |
| VitB12 uptake deficiency | 0                    | 1         |
| <b>No co-morbidity</b>   | <b>7</b>             | <b>2</b>  |
